# Supplementary material for: Pharmaceutical Systems as a Strategy to Enhance the Stability of Oxytetracycline Hydrochloride Polymorphs in Solution
Source: MDPI journal article supplement (doi:10.3390/pharmaceutics15010192), 2023-01-05
Supplement: s1 [file s1]

## Supplementary Material

# Pharmaceutical Systems as a Strategy to Enhance the Stability of Oxytetracycline Hydrochloride Polymorphs in Solution

**Maria S. Bueno** <sup>1,2</sup>, **Marcela R. Longhi** <sup>1,2</sup> and **Claudia Garnero** <sup>1,2,\*</sup>

<sup>1</sup> Departamento de Ciencias Farmacéuticas, Facultad de Ciencias Químicas, Universidad Nacional de Córdoba, Ciudad Universitaria, Haya de la Torre and Medina Allende, Science Building 2, Córdoba X5000HUA, Argentina

<sup>2</sup> Unidad de Investigación y Desarrollo en Tecnología Farmacéutica, CONICET, Consejo Nacional de Investigaciones Científicas y Técnicas, UNITEFA, Córdoba X5000HUA, Argentina

\* Correspondence: cgarnero@unc.edu.ar

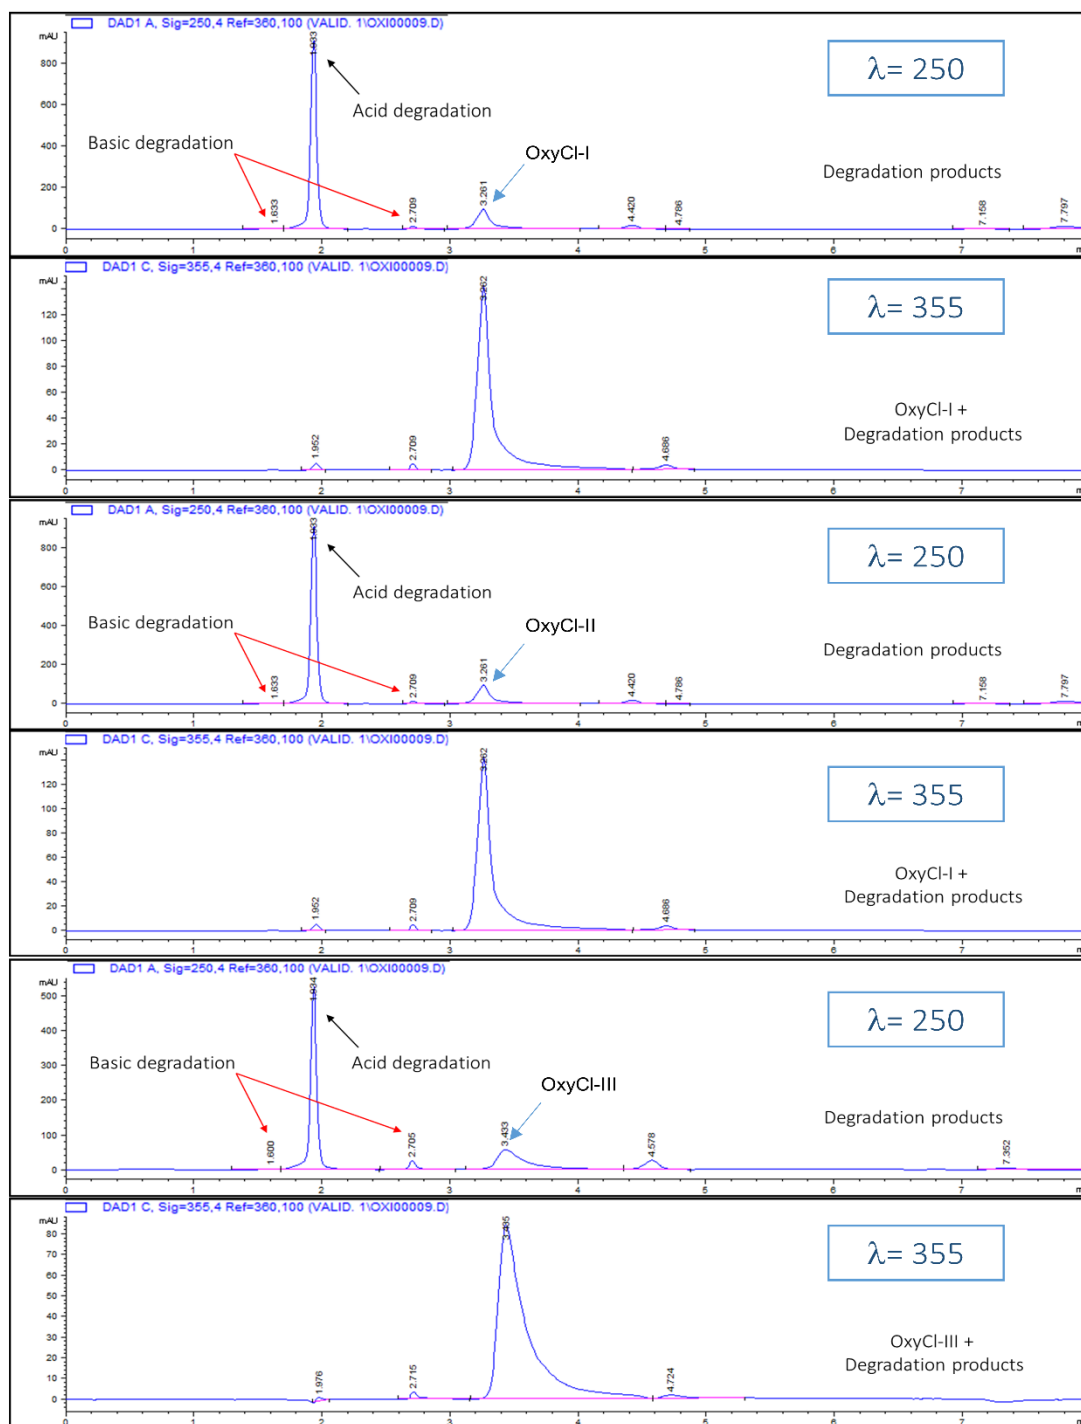

**Figure S1.** Chromatograms of OxyCl polymorphs and degradation products from acid and basic reactions.

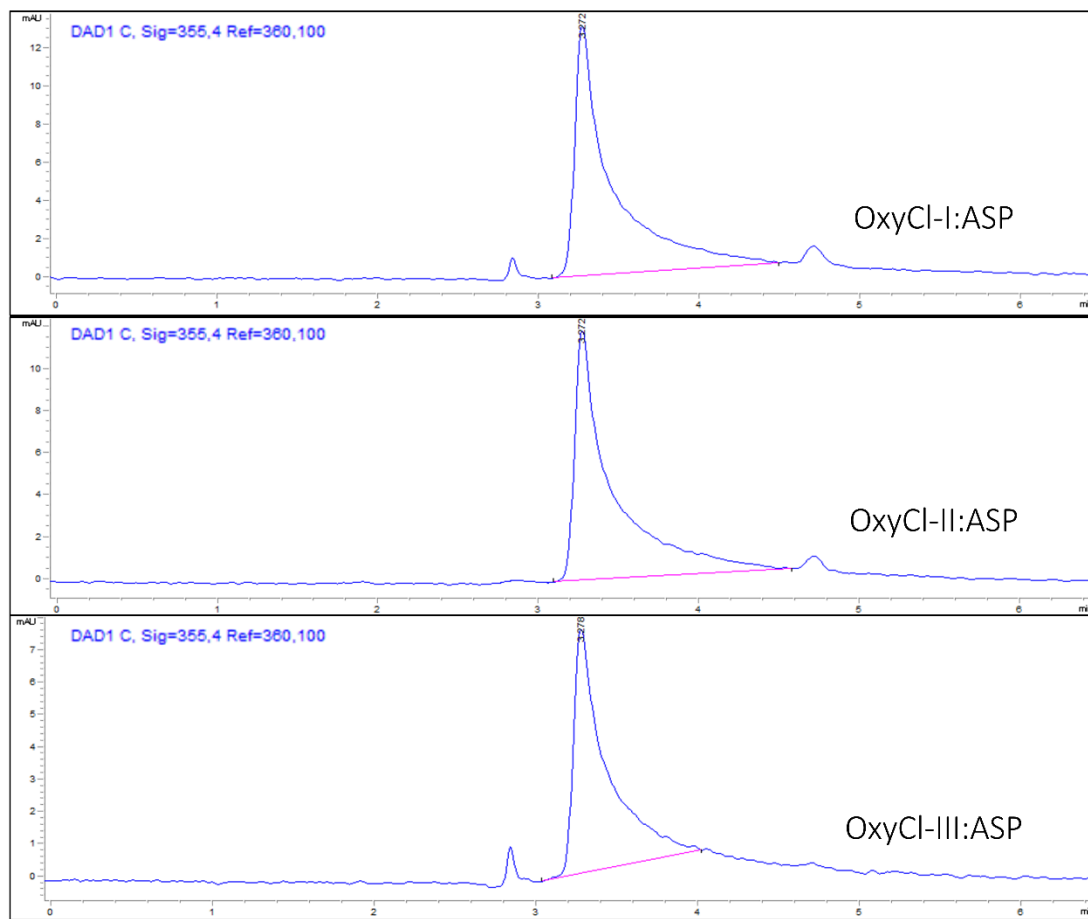

**Figure S2.** Chromatograms of binary systems with ASP in aqueous solution.

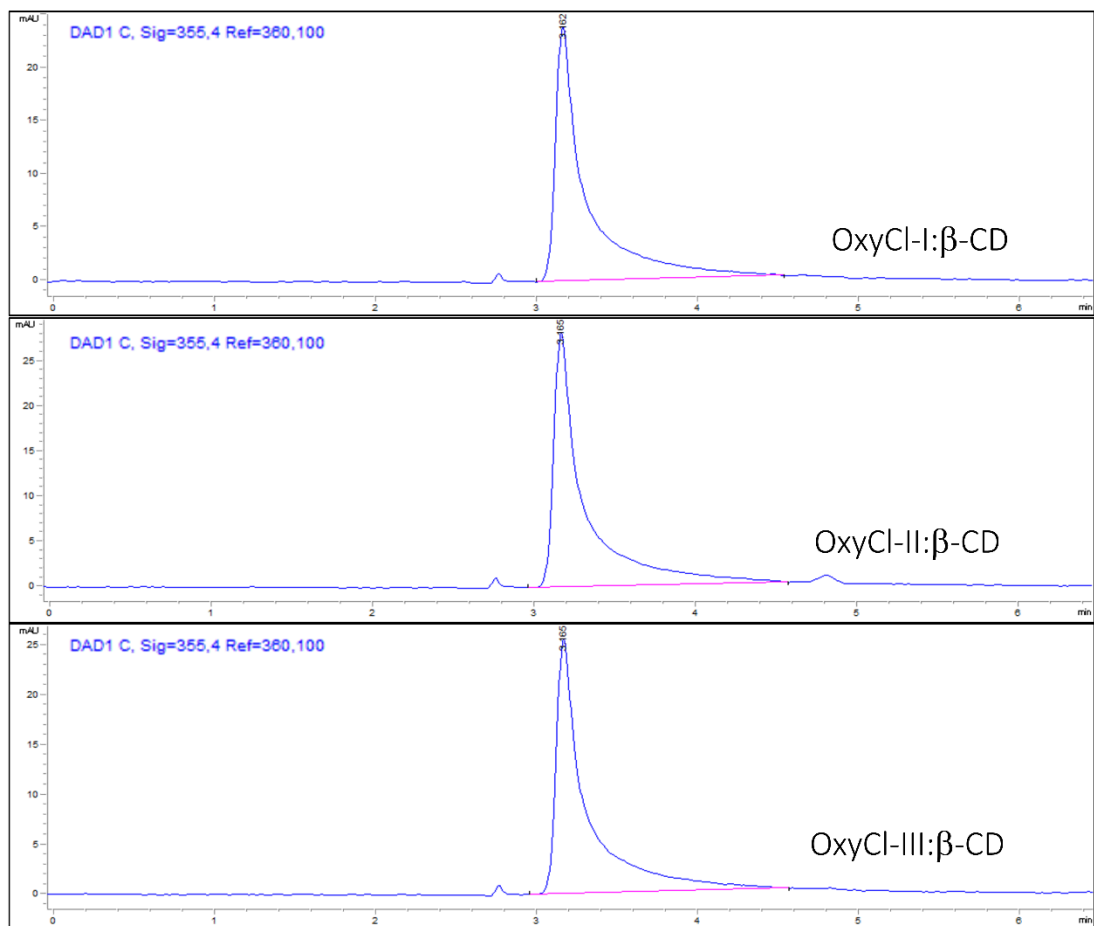

**Figure S3.** Chromatograms of binary systems with  $\beta$ -CD in aqueous solution.

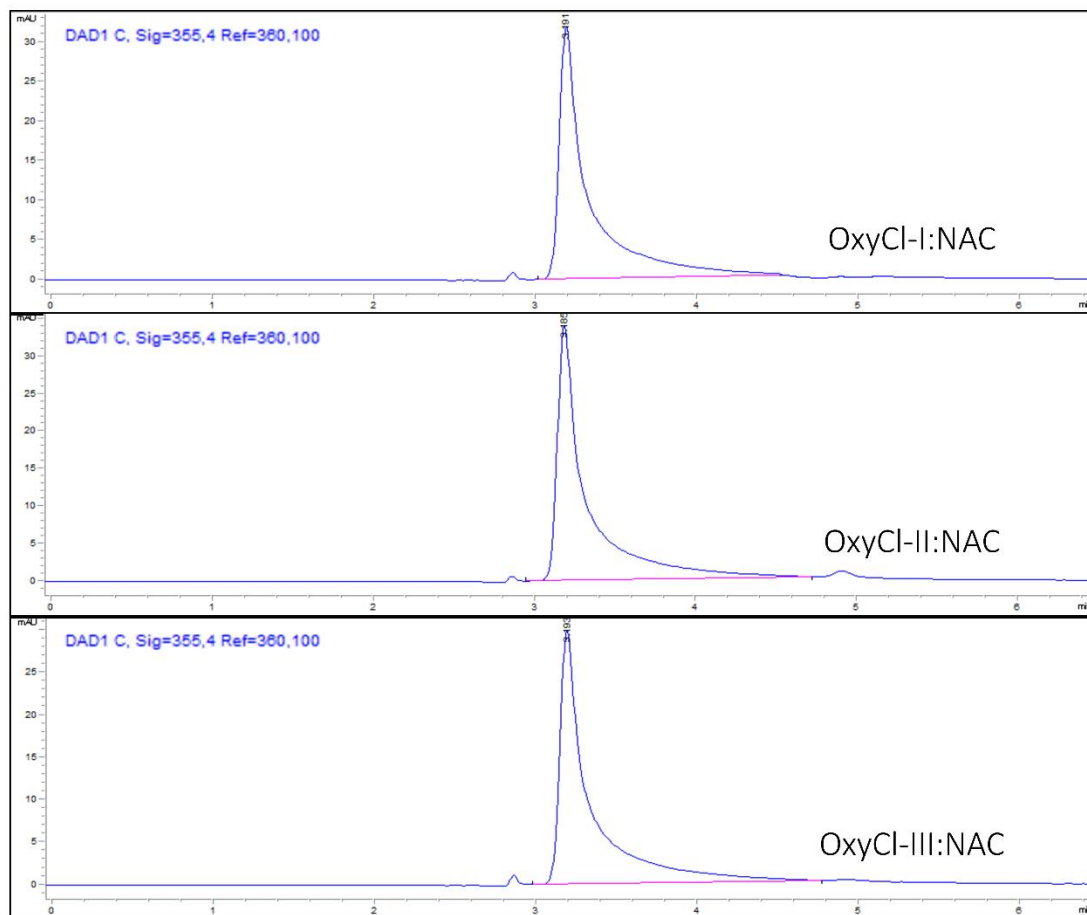

**Figure S4.** Chromatograms of binary systems with NAC in aqueous solution.

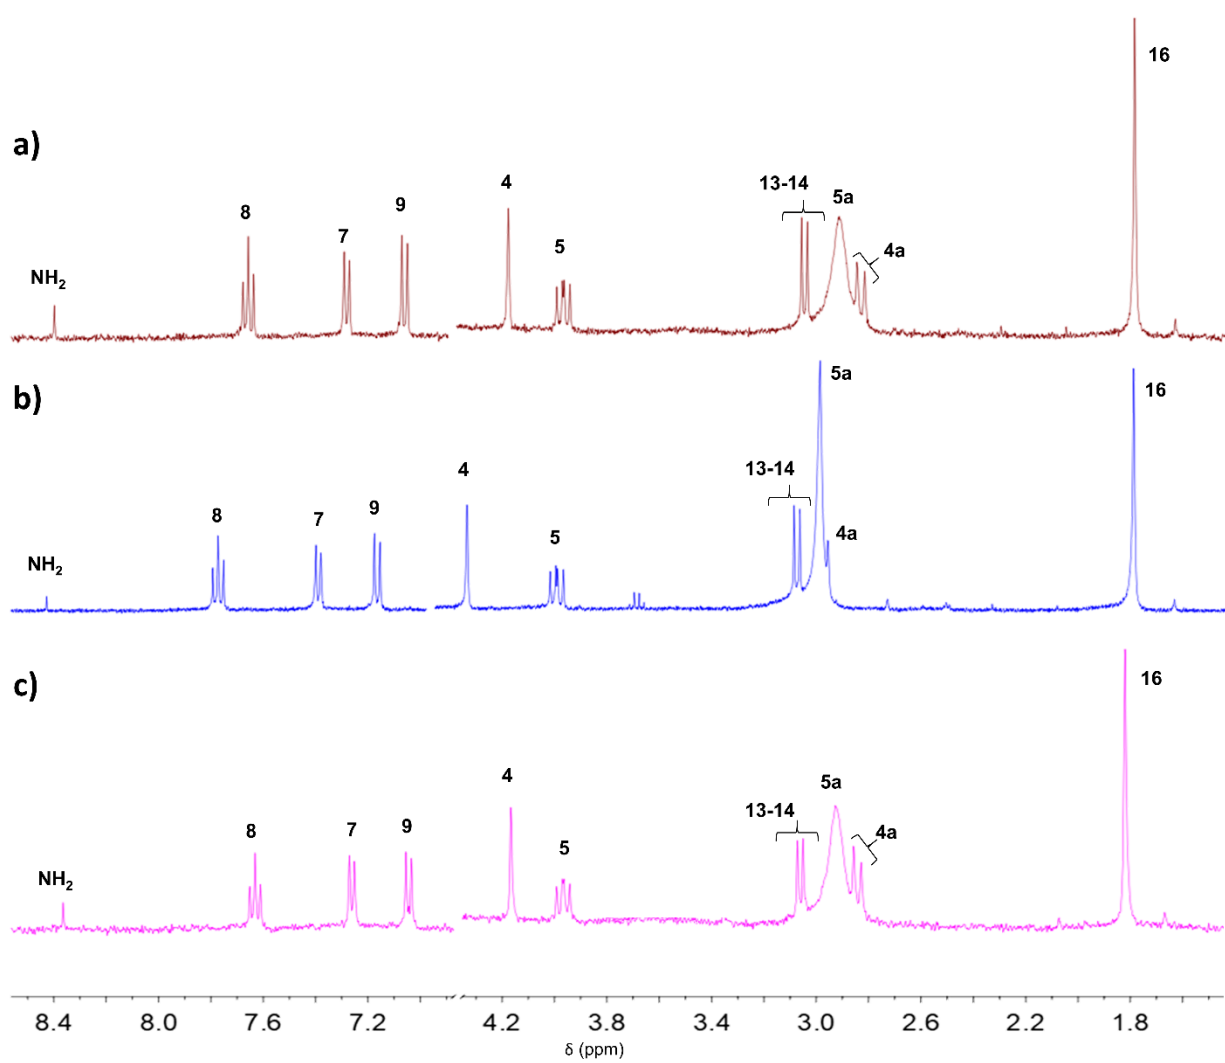

**Figure S5.**  $^1\text{H}$ -NMR chemical assignment of a) OxyCl-I, b) OxyCl-II and c) OxyCl-III.
